# Supplementary material for: Compounds in Indonesian Ginger Rhizome Extracts and Their Potential for Anti-Skin Aging Based on Molecular Docking
Source: MDPI journal article supplement (doi:10.3390/cosmetics9060128), 2022-12-01
Supplement: s1 [file s1]

## Supplementary Material

---

**Table S1.** Compounds in ginger rhizome extracts based on the results of liquid chromatography-mass spectrometry/ mass spectrometry analysis

| No. | Retention Time [min] | Name                        | Molecular Weight (g/mol) | Formula                                                       | Error [ppm] | Abundance (%) |             |                |
|-----|----------------------|-----------------------------|--------------------------|---------------------------------------------------------------|-------------|---------------|-------------|----------------|
|     |                      |                             |                          |                                                               |             | Gajah         | Red         | Emprit         |
| 1   | 1.040                | L-Histidine                 | 155.069                  | C <sub>6</sub> H <sub>9</sub> N <sub>3</sub> O <sub>2</sub>   | -0.93       | 0.28±0.14a    | 0.37±0.15a  | 0.2685±0.1222a |
| 2   | 1.040                | L-(+)-Arginine              | 174.112                  | C <sub>6</sub> H <sub>14</sub> N <sub>4</sub> O <sub>2</sub>  | -0.80       | 0.40±0.25a    | 1.75±0.74b  | -              |
| 3   | 1.056                | L-(-)-Serine                | 105.043                  | C <sub>3</sub> H <sub>7</sub> NO <sub>3</sub>                 | 1.49        | 0.17±0.07a    | -           | -              |
| 4   | 1.069                | Choline                     | 103.100                  | C <sub>5</sub> H <sub>13</sub> NO                             | 1.74        | 4.04±2.00a    | 3.50±1.33a  | 4.2852±2.0211a |
| 5   | 1.069                | D-Asparagine                | 132.053                  | C <sub>4</sub> H <sub>8</sub> N <sub>2</sub> O <sub>3</sub>   | -0.87       | -             | -           | 0.6726±0.0000a |
| 6   | 1.075                | D-Xylonic acid              | 166.047                  | C <sub>5</sub> H <sub>10</sub> O <sub>6</sub>                 | -4.29       | 0.16±0.07a    | -           | -              |
| 7   | 1.083                | D-β-homoserine              | 119.058                  | C <sub>4</sub> H <sub>9</sub> NO <sub>3</sub>                 | 0.25        | 0.29±0.16a    | 0.37±0.00a  | 0.3236±0.1890a |
| 8   | 1.084                | D-Glutamine                 | 146.069                  | C <sub>5</sub> H <sub>10</sub> N <sub>2</sub> O <sub>3</sub>  | -1.12       | 0.54±0.27b    | 0.14±0.05a  | -              |
| 9   | 1.087                | γ-Aminobutyric acid         | 103.064                  | C <sub>4</sub> H <sub>9</sub> NO <sub>2</sub>                 | 1.83        | 0.25±0.12b    | 0.136±0.05a | -              |
| 10  | 1.095                | L-Glutamic acid             | 147.053                  | C <sub>5</sub> H <sub>9</sub> NO <sub>4</sub>                 | -1.31       | 0.69±0.24b    | 0.09±0.03a  | 0.33±0.19ab    |
| 11  | 1.104                | L-(+)-Valine                | 117.079                  | C <sub>5</sub> H <sub>11</sub> NO <sub>2</sub>                | 0.81        | -             | -           | 0.32±0.16a     |
| 12  | 1.105                | L-Pyroglutamic acid         | 129.043                  | C <sub>5</sub> H <sub>7</sub> NO <sub>3</sub>                 | 0.09        | -             | 0.10±0.04a  | -              |
| 13  | 1.107                | β-D-ructofuranosyl          | 324.105                  | C <sub>12</sub> H <sub>20</sub> O <sub>10</sub>               | -1.34       | 0.32±0.19a    | -           | -              |
| 14  | 1.112                | D-(+)-Proline               | 115.063                  | C <sub>5</sub> H <sub>9</sub> NO <sub>2</sub>                 | 0.33        | 0.55±0.29a    | 0.98±0.41a  | 0.63±0.31a     |
| 15  | 1.121                | L-Theanine                  | 174.100                  | C <sub>7</sub> H <sub>14</sub> N <sub>2</sub> O <sub>3</sub>  | -0.48       | 0.10±0.03a    | -           | -              |
| 16  | 1.136                | Mannoheptulose              | 210.074                  | C <sub>7</sub> H <sub>14</sub> O <sub>7</sub>                 | -1.94       | 0.18±0.10a    | -           | -              |
| 17  | 1.143                | α,α-Trehalose               | 342.116                  | C <sub>12</sub> H <sub>22</sub> O <sub>11</sub>               | 0.13        | 0.44±0.21a    | -           | 0.34±0.12a     |
| 18  | 1.158                | D-(+)-Galactose             | 180.063                  | C <sub>6</sub> H <sub>12</sub> O <sub>6</sub>                 | -3.33       | 1.17±0.84a    | -           | -              |
| 19  | 1.205                | D-(+)-Pipicolinic acid      | 129.079                  | C <sub>6</sub> H <sub>11</sub> NO <sub>2</sub>                | -1.04       | 1.37±0.66a    | 7.62±3.16b  | 7.94±0.00b     |
| 20  | 1.205                | Adenosine                   | 267.096                  | C <sub>10</sub> H <sub>13</sub> N <sub>5</sub> O <sub>4</sub> | -1.24       | -             | -           | 0.87±0.00a     |
| 21  | 1.208                | 5'-O-β-D-Glucosylpyridoxine | 331.126                  | C <sub>14</sub> H <sub>21</sub> N <sub>1</sub> O <sub>8</sub> | -1.20       | 0.19±0.09a    | 0.12±0.04a  | 0.18±0.09a     |
| 22  | 1.209                | Malic acid                  | 134.021                  | C <sub>4</sub> H <sub>6</sub> O <sub>5</sub>                  | -6.56       | 1.28±0.60a    | 1.31±0.00a  | 0.94±0.66a     |
| 23  | 1.211                | L-Valine                    | 117.079                  | C <sub>5</sub> H <sub>11</sub> NO <sub>2</sub>                | 0.29        | 1.56±0.00a    | 1.53±0.68a  | -              |

Numbers followed by the same letter consecutively indicate values that are not significantly different (p>0.05).

**Table S1 (continuation).** Compounds in ginger rhizome extracts based on the results of liquid chromatography-mass spectrometry/ mass spectrometry analysis

| No. | Retention Time [min] | Name                                             | Molecular Weight (g/mol) | Formula                                                       | Error [ppm] | Abundance (%) |            |            |
|-----|----------------------|--------------------------------------------------|--------------------------|---------------------------------------------------------------|-------------|---------------|------------|------------|
|     |                      |                                                  |                          |                                                               |             | Gajah         | Red        | Emprit     |
| 24  | 1.212                | 2-Methylamino-isobutyric acid                    | 117.079                  | C <sub>5</sub> H <sub>11</sub> NO <sub>2</sub>                | 0.81        | -             | -          | 1.47±1.14a |
| 25  | 1.217                | Citric acid                                      | 192.026                  | C <sub>6</sub> H <sub>8</sub> O <sub>7</sub>                  | -2.65       | 0.09±0.05a    | 0.14±0.06a | 0.28±0.21a |
| 26  | 1.237                | L-(-)-Methionine                                 | 149.051                  | C <sub>5</sub> H <sub>11</sub> NO <sub>2</sub> S              | -1.68       | -             | 0.63±0.31a | -          |
| 27  | 1.246                | L-Tyrosine                                       | 181.074                  | C <sub>9</sub> H <sub>11</sub> NO <sub>3</sub>                | -1.90       | -             | 0.95±0.51a | -          |
| 28  | 1.248                | N-Benzylformamide                                | 135.068                  | C <sub>8</sub> H <sub>9</sub> NO                              | -1.29       | -             | 0.24±0.00a | -          |
| 29  | 1.249                | 4-Hydroxycinnamic acid                           | 164.047                  | C <sub>9</sub> H <sub>8</sub> O <sub>3</sub>                  | -0.62       | -             | 0.19±0.08a | -          |
| 30  | 1.688                | L-Isoleucine                                     | 131.094                  | C <sub>6</sub> H <sub>13</sub> NO <sub>2</sub>                | -2.11       | 1.04±0.61a    | 2.19±1.55a | 1.52±1.13a |
| 31  | 2.588                | L-Phenylalanine                                  | 165.079                  | C <sub>9</sub> H <sub>11</sub> NO <sub>2</sub>                | -1.28       | 0.64±0.35a    | 0.95±0.38a | 0.53±0.28a |
| 32  | 4.923                | D-Tryptophan                                     | 204.090                  | C <sub>11</sub> H <sub>12</sub> N <sub>2</sub> O <sub>2</sub> | -1.47       | 0.60±0.00a    | 1.73±0.00b | -          |
| 33  | 5.119                | trans-3-Indoleacrylic acid                       | 187.063                  | C <sub>11</sub> H <sub>9</sub> NO <sub>2</sub>                | -1.48       | 0.26±0.13a    | 0.69±0.35a | 0.39±0.26a |
| 34  | 5.516                | D-(+)-Tryptophan                                 | 204.090                  | C <sub>11</sub> H <sub>12</sub> N <sub>2</sub> O <sub>2</sub> | -1.20       | -             | -          | 1.20±0.00a |
| 35  | 7.130                | Catechin                                         | 290.079                  | C <sub>15</sub> H <sub>14</sub> O <sub>6</sub>                | 1.32        | -             | 0.14±0.05a | -          |
| 36  | 8.731                | 2-(acetylamino)-3-(1H-indol-3-yl)-propanoic acid | 246.100                  | C <sub>13</sub> H <sub>14</sub> N <sub>2</sub> O <sub>3</sub> | 0.14        | -             | 0.11±0.04a | -          |
| 37  | 9.987                | N-Desmethyltramadol                              | 249.172                  | C <sub>15</sub> H <sub>23</sub> NO <sub>2</sub>               | -2.00       | -             | 0.18±0.09a | -          |
| 38  | 10.398               | Trp-Trp                                          | 390.168                  | C <sub>22</sub> H <sub>22</sub> N <sub>4</sub> O <sub>3</sub> | -2.39       | 0.24±0.09a    | -          | -          |
| 39  | 10.917               | Dibenzo-18-crown-6                               | 360.158                  | C <sub>20</sub> H <sub>24</sub> O <sub>6</sub>                | 1.05        | -             | -          | 0.66±0.17a |
| 40  | 12.187               | Myricanone                                       | 356.161                  | C <sub>21</sub> H <sub>24</sub> O <sub>5</sub>                | -2.50       | 0.75±0.37b    | 0.11±0.04a | -          |
| 41  | 12.313               | Isoamyl-4-methoxycinnamate                       | 248.141                  | C <sub>15</sub> H <sub>20</sub> O <sub>3</sub>                | -2.52       | -             | 0.10±0.03a | 0.28±0.12b |
| 42  | 12.978               | Pulegone                                         | 152.120                  | C <sub>10</sub> H <sub>16</sub> O                             | -1.33       | 0.66±0.30a    | 0.62±0.50a | -          |
| 43  | 13.178               | 12-epi-Salvinorin A                              | 432.179                  | C <sub>23</sub> H <sub>28</sub> O <sub>8</sub>                | 0.29        | 0.76±0.39a    | -          | -          |
| 44  | 14.735               | Mycophenolate mofetil                            | 433.209                  | C <sub>23</sub> H <sub>31</sub> NO <sub>7</sub>               | -2.85       | 0.23±0.11a    | -          | -          |
| 45  | 14.736               | Falcarindiol                                     | 260.177                  | C <sub>17</sub> H <sub>24</sub> O <sub>2</sub>                | -2.27       | 1.15±1.11a    | 0.59±0.45a | 0.70±0.26a |
| 46  | 14.889               | Methyl cinnamate                                 | 162.068                  | C <sub>10</sub> H <sub>10</sub> O <sub>2</sub>                | -1.93       | 0.42±0.21a    | 0.18±0.08a | 0.20±0.07a |

Numbers followed by the same letter consecutively indicate values that are not significantly different (p>0.05).

**Table S1 (continuation).** Compounds in ginger rhizome extracts based on the results of liquid chromatography-mass spectrometry/ mass spectrometry analysis

| No. | Retention Time [min] | Name                                      | Molecular Weight (g/mol) | Formula                                         | Error [ppm] | Abundance (%) |            |              |
|-----|----------------------|-------------------------------------------|--------------------------|-------------------------------------------------|-------------|---------------|------------|--------------|
|     |                      |                                           |                          |                                                 |             | Gajah         | Red        | Emprit       |
| 47  | 14.899               | 6-Paradol                                 | 278.187                  | C <sub>17</sub> H <sub>26</sub> O <sub>3</sub>  | -2.44       | 0.61±0.00a    | 0.27±0.00a | -            |
| 48  | 15.280               | Embelin                                   | 294.182                  | C <sub>17</sub> H <sub>26</sub> O <sub>4</sub>  | -2.65       | -             | 0.17±0.06a | -            |
| 49  | 15.471               | 6-Gingerol                                | 294.183                  | C <sub>17</sub> H <sub>26</sub> O <sub>4</sub>  | -1.72       | -             | -          | 1.51±2.16a   |
| 50  | 15.481               | Ethyl cinnamate                           | 176.083                  | C <sub>11</sub> H <sub>12</sub> O <sub>2</sub>  | -1.60       | 1.01±0.91a    | 1.08±0.86a | 1.90±1.15a   |
| 51  | 15.481               | 1-Naphthol                                | 144.057                  | C <sub>10</sub> H <sub>8</sub> O                | -1.04       | 0.18±0.09a    | 0.19±0.08a | 0.29±0.11a   |
| 52  | 15.482               | 4-Methoxybenzaldehyde                     | 136.052                  | C <sub>8</sub> H <sub>8</sub> O <sub>2</sub>    | -1.07       | 1.13±1.16a    | 1.08±1.11a | 2.16±1.62a   |
| 53  | 16.141               | d-Corlin                                  | 400.188                  | C <sub>23</sub> H <sub>28</sub> O <sub>6</sub>  | -2.68       | 0.26±0.10a    | -          | -            |
| 54  | 16.426               | Crocetin                                  | 328.167                  | C <sub>20</sub> H <sub>24</sub> O <sub>4</sub>  | -2.58       | 0.31±0.08a    | -          | -            |
| 55  | 16.542               | β,β-Dimethylacrylshikonin                 | 370.141                  | C <sub>21</sub> H <sub>22</sub> O <sub>6</sub>  | -1.87       | 0.22±0.11a    | -          | 0.19±0.11a   |
| 56  | 16.706               | p-Cymene                                  | 134.109                  | C <sub>10</sub> H <sub>14</sub>                 | -1.33       | 3.15±2.05a    | 2.69±2.61a | 1.41±0.59a   |
| 57  | 16.707               | p-Xylene                                  | 106.078                  | C <sub>8</sub> H <sub>10</sub>                  | 1.61        | 0.34±0.16a    | 0.38±0.17a | -            |
| 58  | 16.864               | Curcumin                                  | 368.125                  | C <sub>21</sub> H <sub>20</sub> O <sub>6</sub>  | -1.81       | -             | -          | 0.18±0.07a   |
| 59  | 16.988               | 4'-Methoxyacetophenone                    | 150.068                  | C <sub>9</sub> H <sub>10</sub> O <sub>2</sub>   | -1.89       | -             | -          | 0.29±0.1a    |
| 60  | 16.995               | Octinoxate                                | 290.187                  | C <sub>18</sub> H <sub>26</sub> O <sub>3</sub>  | -2.72       | 0.57±0.28a    | 0.66±0.25b | 1.73±0.64a   |
| 61  | 16.999               | Bisoprolol                                | 325.225                  | C <sub>18</sub> H <sub>31</sub> NO <sub>4</sub> | -2.33       | -             | 0.13±0.05a | 0.47±0.23b   |
| 62  | 17.100               | Citral                                    | 152.120                  | C <sub>10</sub> H <sub>16</sub> O               | -1.58       | 0.85±0.57a    | 1.10±0.56a | 0.45±0.22a   |
| 63  | 17.804               | Testosterone                              | 288.208                  | C <sub>19</sub> H <sub>28</sub> O <sub>2</sub>  | -2.08       | -             | 0.14±0.06a | -            |
| 64  | 18.359               | 11-nor-9-carboxy-δ-9-tetrahydrocannabinol | 344.196                  | C <sub>21</sub> H <sub>28</sub> O <sub>4</sub>  | -8.99       | -             | -          | 0.19±0.08a   |
| 65  | 18.380               | 6-β-hydroxy testosterone                  | 304.203                  | C <sub>19</sub> H <sub>28</sub> O <sub>3</sub>  | -2.16       | 2.24±1.05a    | 2.54±2.29a | -            |
| 66  | 18.410               | 8-Shogaol                                 | 276.172                  | C <sub>17</sub> H <sub>24</sub> O <sub>3</sub>  | -2.09       | 1.28±0.00b    | 0.71±0.00a | -            |
| 67  | 18.568               | 6-Gingerdione                             | 292.167                  | C <sub>17</sub> H <sub>24</sub> O <sub>4</sub>  | -2.52       | 0.94±0.00a    | 1.44±0.00a | 1.4896±0.00a |

Numbers followed by the same letter consecutively indicate values that are not significantly different (p>0.05).

**Table S1 (continuation).** Compounds in ginger rhizome extracts based on the results of liquid chromatography-mass spectrometry/ mass spectrometry analysis

| No. | Retention Time [min] | Name                                             | Molecular Weight (g/mol) | Formula                                        | Error [ppm] | Abundance (%) |            |            |
|-----|----------------------|--------------------------------------------------|--------------------------|------------------------------------------------|-------------|---------------|------------|------------|
|     |                      |                                                  |                          |                                                |             | Gajah         | Red        | Emprit     |
| 68  | 18.591               | Nandrolone                                       | 274.193                  | C <sub>18</sub> H <sub>26</sub> O <sub>2</sub> | -1.99       | 0.28±0.14a    | 0.14±0.06a | -          |
| 69  | 18.849               | Dehydrocostus Lactone                            | 230.130                  | C <sub>15</sub> H <sub>18</sub> O <sub>2</sub> | -2.26       | 0.71±0.38a    | -          | -          |
| 70  | 18.999               | 4-Shogaol                                        | 276.172                  | C <sub>17</sub> H <sub>24</sub> O <sub>3</sub> | -2.69       | -             | -          | 1.26±0.00a |
| 71  | 19.118               | Methenolone                                      | 302.224                  | C <sub>20</sub> H <sub>30</sub> O <sub>2</sub> | -3.08       | -             | -          | 0.94±0.00a |
| 72  | 19.344               | 4-Methylumbelliferone                            | 176.047                  | C <sub>10</sub> H <sub>8</sub> O <sub>3</sub>  | -127        | -             | 0.18±0.07a | 0.23±0.09a |
| 73  | 19.858               | Steviol                                          | 318.219                  | C <sub>20</sub> H <sub>30</sub> O <sub>3</sub> | -2.57       | -             | 0.13±0.05a | 0.23±0.10a |
| 74  | 19.998               | Pregnane-3,20-dione                              | 316.239                  | C <sub>21</sub> H <sub>32</sub> O <sub>2</sub> | -2.44       | -             | -          | 0.31±0.11a |
| 75  | 20.028               | Ubiquinol 10                                     | 320.198                  | C <sub>19</sub> H <sub>28</sub> O <sub>4</sub> | -2.33       | 1.20±1.15a    | 1.06±0.91a | -          |
| 76  | 20.325               | 10-Hydroxy-3-methoxy-1,3,5,7-cadinatetraen-9-one | 260.141                  | C <sub>16</sub> H <sub>20</sub> O <sub>3</sub> | -1.73       | -             | 0.14±0.05a | -          |
| 77  | 20.334               | Zerumbone                                        | 218.167                  | C <sub>15</sub> H <sub>22</sub> O              | -2.06       | 0.30±0.14a    | 0.15±0.06a | 0.27±0.12a |
| 78  | 20.597               | 5a-Pregnane-3,20-dione                           | 316.240                  | C <sub>21</sub> H <sub>32</sub> O <sub>2</sub> | -1.86       | -             | 0.33±0.00a | -          |
| 79  | 21.089               | 10-Shogaol                                       | 350.245                  | C <sub>21</sub> H <sub>34</sub> O <sub>4</sub> | -2.16       | -             | -          | 0.36±0.18a |
| 80  | 21.095               | 20- $\alpha$ -Dhydrodydrogesterone               | 332.234                  | C <sub>21</sub> H <sub>32</sub> O <sub>3</sub> | -2.70       | 3.38±2.99a    | 3.34±3.25a | 7.06±4.52a |
| 81  | 21.106               | (E)-4-Methoxycinnamic acid                       | 178.063                  | C <sub>10</sub> H <sub>10</sub> O <sub>3</sub> | -1.74       | -             | 0.27±0.09a | -          |
| 82  | 21.205               | $\alpha$ -Curcumene                              | 202.172                  | C <sub>15</sub> H <sub>22</sub>                | -1.35       | -             | -          | 0.15±0.06a |
| 83  | 21.213               | Curcumene                                        | 202.172                  | C <sub>15</sub> H <sub>22</sub>                | -1.43       | 0.61±0.38a    | 0.75±0.26a | -          |
| 84  | 21.225               | 4-Vinylcyclohexene                               | 108.094                  | C <sub>8</sub> H <sub>12</sub>                 | 1.17        | -             | 0.19±0.08a | -          |
| 85  | 22.021               | Pentylbenzene                                    | 148.125                  | C <sub>11</sub> H <sub>16</sub>                | -0.88       | -             | 0.29±0.11a | 0.40±0.15a |
| 86  | 22.023               | (E,E)- $\alpha$ -Farnesene                       | 204.188                  | C <sub>15</sub> H <sub>24</sub>                | -1.73       | -             | 3.11±2.98a | 6.04±4.74a |
| 87  | 22.136               | Ferulic acid                                     | 194.058                  | C <sub>10</sub> H <sub>10</sub> O <sub>4</sub> | -1.03       | 0.25±0.13a    | 0.28±0.10a | -          |
| 88  | 22.504               | R-(+)-Tolterodine                                | 325.240                  | C <sub>22</sub> H <sub>31</sub> NO             | -2.65       | -             | -          | 0.30±0.13a |
| 89  | 23.235               | Ubiquinone-2                                     | 318.182                  | C <sub>19</sub> H <sub>26</sub> O <sub>4</sub> | -2.16       | 0.80±0.39a    | 1.05±0.44b | -          |
| 90  | 23.702               | Drostanolone propionate                          | 360.265                  | C <sub>23</sub> H <sub>36</sub> O <sub>3</sub> | -3.08       | -             | -          | 0.55±0.23a |

Numbers followed by the same letter consecutively indicate values that are not significantly different ( $p>0.05$ ).

**Table S1 (continuation).** Compounds in ginger rhizome extracts based on the results of liquid chromatography-mass spectrometry/ mass spectrometry analysis

| No. | Retention Time [min] | Name                                   | Molecular Weight (g/mol) | Formula                                          | Error [ppm] | Abundance (%) |            |            |
|-----|----------------------|----------------------------------------|--------------------------|--------------------------------------------------|-------------|---------------|------------|------------|
|     |                      |                                        |                          |                                                  |             | Gajah         | Red        | Emprit     |
| 91  | 25.164               | Epristeride                            | 399.276                  | C <sub>25</sub> H <sub>37</sub> NO <sub>3</sub>  | -2.18       | -             | -          | 0.77±0.32a |
| 92  | 25.220               | 17- $\alpha$ -21-dihydroxypregnenolone | 348.229                  | C <sub>21</sub> H <sub>32</sub> O <sub>4</sub>   | -2.42       | 1.30±0.66a    | 0.74±0.52b | -          |
| 93  | 25.221               | Hydroxyprogesterone                    | 330.218                  | C <sub>21</sub> H <sub>30</sub> O <sub>3</sub>   | -3.59       | -             | -          | 0.69±0.26a |
| 94  | 25.614               | Corticosterone                         | 346.213                  | C <sub>21</sub> H <sub>30</sub> O <sub>4</sub>   | -2.84       | 1.54±1.34a    | 1.13±0.81a | -          |
| 95  | 26.264               | 1-Heptadecanoyl-glycero-3-phospate     | 424.260                  | C <sub>20</sub> H <sub>41</sub> O <sub>7</sub> P | 2.66        | -             | 0.14±0.05a | -          |
| 96  | 26.613               | ent-cassa-12,15-diene                  | 272.250                  | C <sub>20</sub> H <sub>32</sub>                  | -2.19       | -             | -          | 0.28±0.16a |
| 97  | 27.156               | Hecogenin                              | 430.308                  | C <sub>27</sub> H <sub>42</sub> O <sub>4</sub>   | -1.14       | -             | 0.77±0.30a | -          |
| 98  | 27.653               | Calcitroic acid                        | 374.245                  | C <sub>23</sub> H <sub>34</sub> O <sub>4</sub>   | -2.68       | 0.23±0.00a    | -          | 0.28±0.13a |

**Table S2.** Examples of test and control ligand structures

| No. | Ligand        | Chemical Formula  | Before Preparation                                                                    | After Preparation                                                                     |
|-----|---------------|-------------------|---------------------------------------------------------------------------------------|---------------------------------------------------------------------------------------|
| 1   | 10-Shogaol    | $C_{21}H_{32}O_3$ | 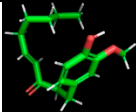   |    |
| 2   | Citral        | $C_{10}H_{16}O$   |    |    |
| 3   | Octinoxate    | $C_{18}H_{26}O_3$ |    |    |
| 4   | 6-Gingerdione | $C_{17}H_{24}O_4$ |    |    |
| 5   | p-Cymene      | $C_{10}H_{14}$    |    |    |
| 6   | 4-Shogaol     | $C_{15}H_{20}O_3$ |   |   |
| 7   | Catechin      | $C_{15}H_{14}O_6$ |  |  |
| 8   | 6-Paradol     | $C_{17}H_{26}O_3$ |  |  |
| 9   | 6-Gingerol    | $C_{17}H_{26}O_4$ |  |  |
| 10  | Ascorbic acid | $C_6H_8O_6$       |  |  |

**Table S3.** The affinity energy of the ligand-receptor complex

| Ligand                                           | Affinity Energy (kcal/mol) |      |       |      | Ligand                              | Affinity Energi (kcal/mol) |       |       |       |
|--------------------------------------------------|----------------------------|------|-------|------|-------------------------------------|----------------------------|-------|-------|-------|
|                                                  | 2TCL                       | 2PE4 | 3F19  | 5M8R |                                     | 2TCL                       | 2PE4  | 3F19  | 5M8R  |
| L-Histidine                                      | -6.1                       | -5.0 | -6.0  | -5.3 | $\alpha,\alpha$ -Trehalose          | -6.2                       | -6.2  | -6.7  | -5.9  |
| L-(+)-Arginine                                   | -6.1                       | -4.8 | -6.0  | -5.0 | D-(+)-Galactose                     | -6.3                       | -5.3  | -5.9  | -5.3  |
| L-(-)-Serine                                     | -4.2                       | -4.0 | -4.2  | -4.2 | D-(+)-Pipicolinic Acid              | -5.8                       | -5.3  | -6.1  | -5.5  |
| Choline                                          | -4.5                       | -3.5 | -3.8  | -4.0 | Adenosine                           | -7.0                       | -6.9  | -7.8  | -6.2  |
| D-Asparagine                                     | -5.4                       | -4.9 | -5.4  | -4.8 | 5'-O- $\beta$ -D-Glucosylpyridoxine | -7.1                       | -6.9  | -8.1  | -6.9  |
| D-Xylonic acid                                   | -5.9                       | -5.0 | -5.3  | -5.2 | Malic Acid                          | -5.4                       | -4.8  | -5.0  | -5.1  |
| D-(+)-Proline                                    | -5.2                       | -5.0 | -5.2  | -4.9 | L-Isoleucine                        | -5.6                       | -5.1  | -5.3  | -5.0  |
| L-Theanine                                       | -6.1                       | -5.5 | -5.9  | -5.1 | L-Phenylalanine                     | -6.6                       | -6.4  | -6.8  | -6.1  |
| Mannoheptulose                                   | -6.3                       | -5.6 | -6.4  | -5.3 | D-Tryptophan                        | -7.2                       | -6.7  | -7.8  | -6.8  |
| trans-3-Indoleacrylic Acid                       | -6.7                       | -6.4 | -7.6  | -7.0 | Falcarindiol                        | -5.6                       | -6.2  | -7.1  | -5.8  |
| Catechin                                         | -8.8                       | -7.9 | -9.7  | -8.4 | Methyl Cinnamate                    | -6.0                       | -6.1  | -6.7  | -5.6  |
| 2-(Acetylamino)-3-(1H-Indol-3-yl)-Propanoic Acid | -7.1                       | -6.7 | -8.0  | -7.4 | 6-Paradol                           | -5.7                       | -6.8  | -7.9  | -5.5  |
| N-Desmethyltramadol                              | -6.5                       | -6.0 | -8.9  | -6.4 | Embelin                             | -6.2                       | -7.0  | -7.3  | -6.1  |
| Trp-Trp                                          | -8.6                       | -9.0 | -10.2 | -8.4 | 6-Gingerol                          | -6.1                       | -6.7  | -8.0  | -6.8  |
| Dibenzo-18-crown-6                               | -7.3                       | -7.3 | -7.1  | -7.4 | Ethyl Cinnamate                     | -6.1                       | -6.1  | -7.0  | -5.5  |
| Myricanone                                       | -6.0                       | -7.1 | -6.4  | -6.6 | 1-Naphthol                          | -6.9                       | -6.7  | -7.3  | -6.3  |
| Isoamyl-4-methoxycinnamate                       | -6.0                       | -6.5 | -7.8  | -6.9 | 4-Methoxybenzaldehyde               | -5.7                       | -5.3  | -5.8  | -5.8  |
| Pulegone                                         | -5.6                       | -6.6 | -6.9  | -5.8 | d-Corlin                            | -14.6                      | -13.9 | -16.0 | -13.4 |
| 12-epi-Salvinorin A                              | -6.9                       | -7.6 | -8.9  | -8.0 | Crocetin                            | -6.2                       | -6.9  | -8.0  | -6.7  |
| Mycophenolate Mofetil                            | -7.3                       | -7.0 | -9.1  | -7.0 | p-Cymene                            | -5.9                       | -6.6  | -6.5  | -5.8  |
| 6- $\beta$ -Hydroxytestosterone                  | -5.8                       | -7.2 | -7.4  | -7.6 | p-Xylene                            | -5.3                       | -5.5  | -5.5  | -4.9  |
| 8-Shogaol                                        | -6.0                       | -6.9 | -8.0  | -6.4 | Curcumin                            | -6.4                       | -7.7  | -8.8  | -7.7  |

Note: 2TCL: collagenase, 2PE4: hyaluronidase, 3F19: elastase, 5M8R: tyrosinase



**Table S3 (continuation).** The affinity energy of the ligand-receptor complex

| Ligand                  | Affinity Energy (kcal/mol) |       |       |       | Ligand                                           | Affinity Energy (kcal/mol) |       |       |       |
|-------------------------|----------------------------|-------|-------|-------|--------------------------------------------------|----------------------------|-------|-------|-------|
|                         | 2TCL                       | 2PE4  | 3F19  | 5M8R  |                                                  | 2TCL                       | 2PE4  | 3F19  | 5M8R  |
| 6-Gingerdione           | -5.9                       | -6.4  | -7.9  | -6.6  | 4'-Methoxyacetophenone                           | -6.1                       | -5.7  | -6.3  | -5.5  |
| Nandrolone              | -6.3                       | -8.1  | -7.2  | -7.4  | Octinoxate                                       | -6.1                       | -7.2  | -7.8  | -6.3  |
| Dehydrocostus Lactone   | -6.7                       | -7.2  | -7.7  | -7.5  | Bisoprolol                                       | -6.3                       | -5.9  | -7.5  | -6.1  |
| 4-Shogaol               | -6.1                       | -6.8  | -7.6  | -6.3  | Citral                                           | -5.3                       | -5.3  | -6.3  | -5.8  |
| Methenolone             | -6.3                       | -7.2  | -7.5  | -7.5  | Testosterone                                     | -5.9                       | -7.3  | -7.3  | -7.6  |
| 4-Methylumbelliferone   | -6.7                       | -6.4  | -7.2  | -6.6  | 10-Hydroxy-3-methoxy-1,3,5,7-cadinatetraen-9-one | -6.8                       | -7.1  | -7.1  | -6.4  |
| Steviol                 | -5.7                       | -7.0  | -7.2  | -8.4  | Zerumbone                                        | -5.2                       | -5.9  | -6.8  | -8.0  |
| Pregnane-3,20-dione     | -6.1                       | -8.0  | -7.6  | -8.3  | 5a-Pregnane-3,20-dione                           | -6.0                       | -8.1  | -7.6  | -8.3  |
| D-β-Homoserine          | -4.8                       | -4.3  | -4.3  | -4.5  | L-Valine                                         | -5.4                       | -4.7  | -5.1  | -4.9  |
| D-Glutamine             | -6.0                       | -5.1  | -5.5  | -5.1  | 2-(Methylamino)-isobutyric Acid                  | -4.8                       | -4.7  | -4.6  | -4.6  |
| γ-Aminobutyric acid     | -4.7                       | -4.5  | -4.2  | -4.3  | Citric Acid                                      | -6.2                       | -5.6  | -6.0  | -5.5  |
| L-Glutamic Acid         | -5.8                       | -5.0  | -5.3  | -5.0  | L-(-)-Methionine                                 | -4.6                       | -4.5  | -4.8  | -4.3  |
| L-(+)-Valine            | -5.1                       | -4.8  | -5.1  | -4.9  | L-Tyrosine                                       | -6.8                       | -6.0  | -6.8  | -5.9  |
| Ubiquinol 10            | -8.4                       | -11.3 | -11.9 | -11.5 | 10-Shogaol                                       | -5.5                       | -7.0  | -7.7  | -6.6  |
| Drostanolone Propionate | 7.2                        | -7.9  | -8.2  | -8.8  | 20-α-Dihydrodydrogesterone                       | -10.6                      | -11.4 | -13.0 | -10.6 |
| Epristeride             | -6.6                       | -8.5  | -8.1  | -8.2  | (E)-4-Methoxycinnamic Acid                       | -6.1                       | -6.1  | -7.2  | -6.9  |
| Hydroxyprogesterone     | -6.5                       | -7.1  | -7.6  | -8.8  | α-Curcumene                                      | -6.6                       | -7.0  | -8.2  | -6.7  |
| Corticosterone          | -6.1                       | -7.4  | -7.8  | -8.5  | 4-Vinylcyclohexene                               | -5.6                       | -6.0  | -5.4  | -4.7  |
| Ascorbic Acid           | -6.4                       | -5.6  | -6.1  | -6.0  | Pentylbenzene                                    | -5.7                       | -6.5  | -5.4  | -5.1  |
| L-Pyroglutamic Acid     | -5.7                       | -5.0  | -5.9  | -5.1  | N-Benzylformamide                                | -5.8                       | -5.7  | -5.9  | -5.8  |
| β-D-Fructofuranose      | -5.9                       | -5.1  | -6.2  | -5.0  | R-(+)-Tolterodine                                | -7.1                       | -7.3  | -7.1  | -6.4  |
| ent-Cassa-12,15-diene   | -5.6                       | -7.9  | -8.0  | -8.2  | (E,E)-α-Farnesene                                | -6.1                       | -6.6  | -7.3  | -5.6  |
| Hecogenin               | -7.8                       | -8.9  | -9.7  | -8.5  | Ferulic Acid                                     | -6.8                       | -5.9  | -7.2  | -6.4  |
| Calcitroic Acid         | -6.6                       | -7.6  | -7.8  | -7.5  |                                                  |                            |       |       |       |

Note: 2TCL: collagenase, 2PE4: hyaluronidase, 3F19: elastase, 5M8R: tyrosinase
